# Supplementary material
Source: PubMed Central journal article supplement (PMC5394308)
Supplement: AEM.03478-16_zam009177797s1.pdf [file AEM.03478-16_zam009177797s1.pdf]

## **Use of bacteria to stabilize archaeological iron**

Comensoli Lucrezia<sup>1,2</sup>, Maillard Julien<sup>3</sup>, Albini Monica<sup>1,2</sup>, Sandoz Frederic<sup>1</sup>, Junier Pilar<sup>1\*</sup>, Joseph Edith<sup>2,4\*</sup>

<sup>1</sup>*Laboratory of Microbiology, Institute of Biology, University of Neuchâtel, 2000 Neuchâtel, Switzerland, pilar.junier@unine.ch*

<sup>2</sup>*Laboratory of Technologies for Heritage Materials, Institute of Chemistry, University of Neuchâtel, Switzerland, edith.joseph@unine.ch*

<sup>3</sup>*Laboratory for Environmental Biotechnology, ENAC-IIE-LBE, Ecole Polytechnique Fédérale de Lausanne, 1015 Lausanne, Switzerland*

<sup>4</sup>*Haute Ecole Arc Conservation-Restoration, HES-SO, 2000 Neuchâtel, Switzerland, edith.joseph@he-arc.ch*

*\*co-corresponding authors*

## **Supplementary material**

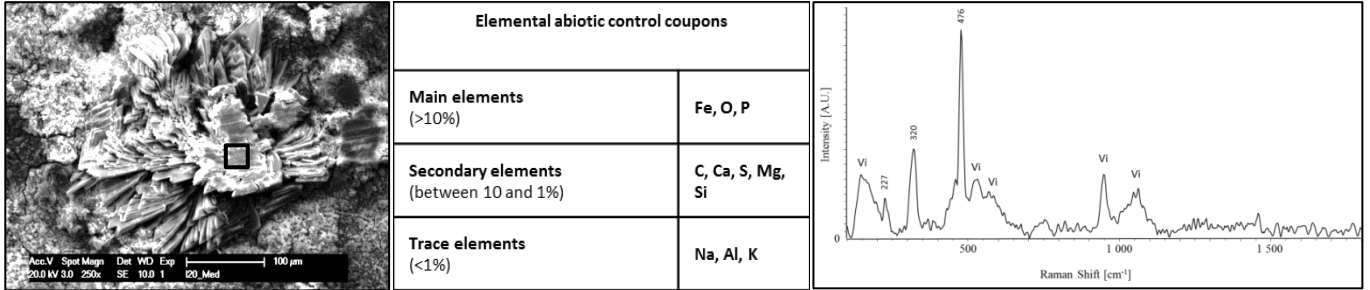

**Supplementary Figure S1.** Secondary elemental image of the crystals found on the abiotic control coupons, elemental composition, and corresponding Raman spectra identified as vivianite (Vi).

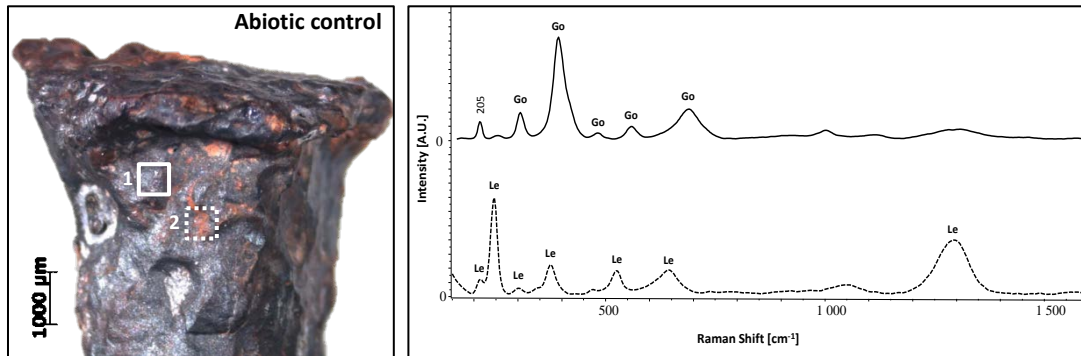

**Supplementary Figure S2.** Raman analysis of the abiotic control nail after the reduction test. On the left, the stereoscope images of the area sampled for the analysis; and, on the right, the corresponding Raman spectra identified as; 1: Goethite (Go), 2: Lepidocrocite (Le).

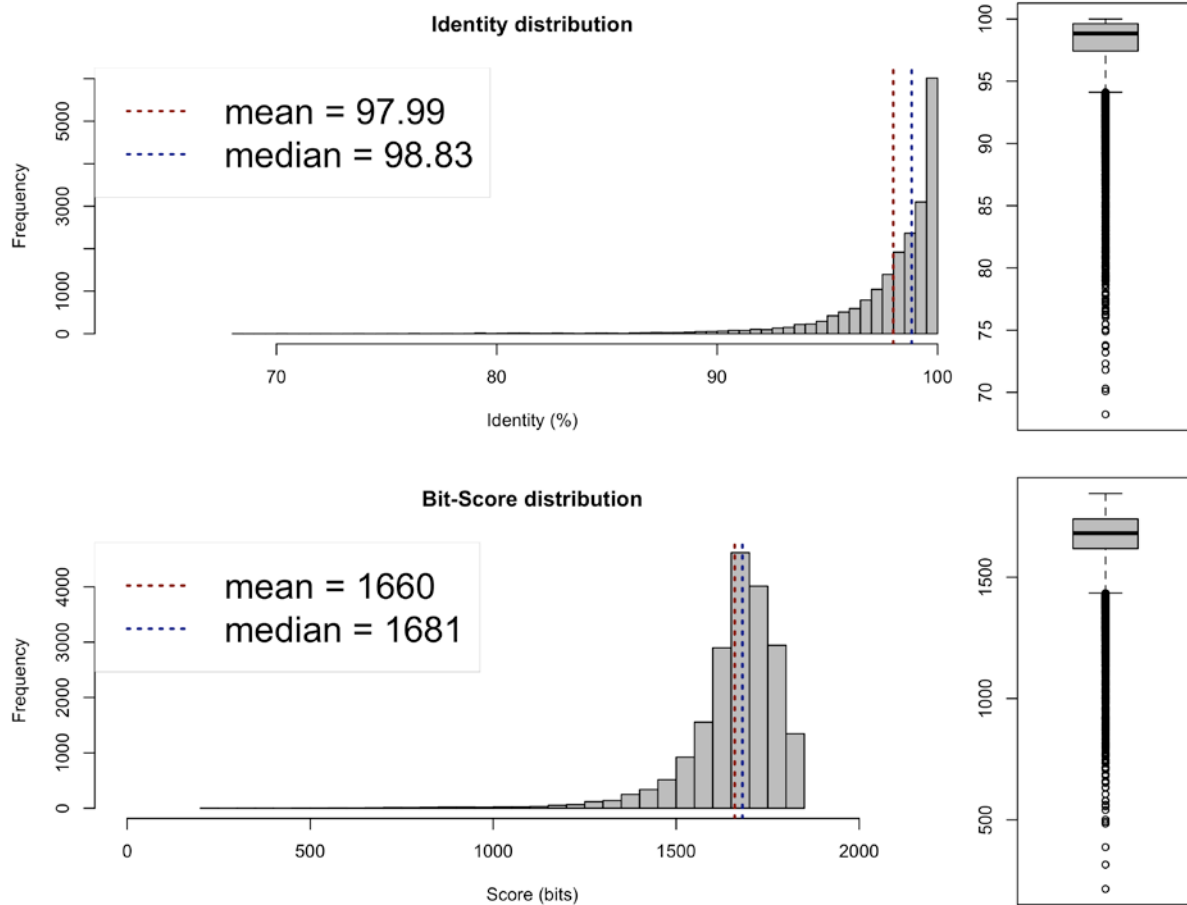

**Supplementary Figure S3.** Results of the average nucleotide identity (ANI) analysis performed between *Desulfitobacterium hafniense* strain LBE and the reference genome of *D. hafniense* strain DCB-2 (GenBank accession number NC\_011830.1). The analysis was performed using the on-line ANI calculator tool available at <http://enve-omics.ce.gatech.edu>.

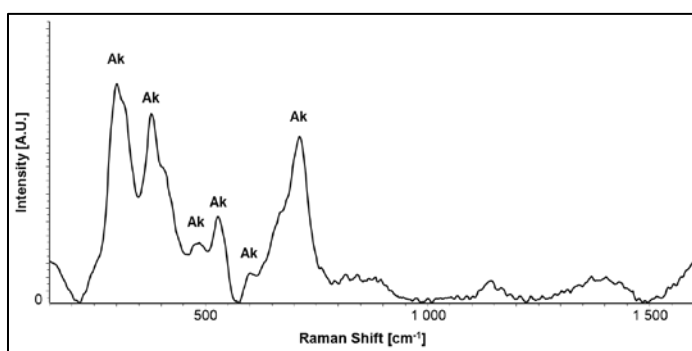

**Supplementary Figure S4.** Raman spectrum of the synthetic akaganeite. The analysis was carried out with a Horiba-Jobin Yvon Labram Aramis microscope equipped with a Nd:YAG laser of 532 nm at power lower than 1 mW (600 gr/mm). The spectral interval was 100 and 1600 cm<sup>-1</sup> and the measurement conditions were 1000 μm hole, 100 μm slit and 5 accumulations of 100 s.

**Supplementary material:** Anaerobic standard medium for *Desulfitobacterium hafniense*

**Standard minimal medium (MM) according to Prat L, Maillard J, Grimaud R, Holliger C. 2011.**

Physiological adaptation of *Desulfitobacterium hafniense* strain TCE1 to tetrachloroethene respiration. Applied and environmental microbiology **77**:3853-3859.

Mixture for 50 mL of culture, add aseptically with syringes the following solutions to 45 mL of **solution A**:

- 1.25 mL solution B
- 2.50 mL solution C
- 1.25 mL solution D
- 0.5 mL sodium lactate 40% (v/v)
- 1 mL disodium fumarate 16% (v/v)

### **Solutions**

#### **Solution A :**

- $K_2HPO_4 \cdot 3 H_2O$             0.958 g/L
- $NaH_2PO_4 \cdot 2H_2O$         0.218 g/L
- Peptone                      0.1 g/L
- Resazurin 0.5g/L          1 mL

➔ Boil, cool down under  $N_2/CO_2$ , distribute to anaerobic flasks, gas exchange for  $N_2/CO_2$ , autoclave.

#### **Solution B :**

To 20 mL of anaerobic sterile  $H_2O$ , add the following solutions:

- 1 mL solution IV, filter sterilize
- 1 mL solution V
- 1 mL solution VI
- 1 mL solution VII
- 1 mL solution VIII

#### **Solution C :**

To 49 mL of solution IX, add :

- 1 mL solution X

#### **Solution D :**

- $CaCl_2 \cdot 2 H_2O$             4.40 g/L
- $MgCl_2 \cdot 6 H_2O$             4.06 g/L

→ Gas exchange for N<sub>2</sub>, autoclave.

#### **Solution IV : Trace elements**

- EDTA 500 mg/L, dissolve in 900 mL H<sub>2</sub>O, adjust the pH to 7.0 with HCl, then add:
- FeCl<sub>2</sub>·4 H<sub>2</sub>O 2000 mg/L
- MnCl<sub>2</sub>·4 H<sub>2</sub>O 100 mg/L
- CoCl<sub>2</sub>·6 H<sub>2</sub>O 190 mg/L
- ZnCl<sub>2</sub> 70 mg/L
- CuCl<sub>2</sub>·2 H<sub>2</sub>O 2.55 mg/L
- AlCl<sub>3</sub> 5.52 mg/L
- H<sub>3</sub>BO<sub>3</sub> 6 mg/L
- Na<sub>2</sub>MoO<sub>4</sub>·2 H<sub>2</sub>O 41.4 mg/L
- NiCl<sub>2</sub>·6 H<sub>2</sub>O 24 mg/L, add to 1 L with H<sub>2</sub>O

#### **Solution V : Vitamins-1**

- Biotin 50 mg/L
  - P-aminobenzoate (sodium salt) 250mg/L
  - Pantothenate (sodium salt) 50mg/L
  - Folic acid·2 H<sub>2</sub>O 20mg/L
  - Lipoic acid 50mg/L
  - Pyridoxine 100mg/L
  - Nicotinic acid 550mg/L
- Filter sterilize in sterile anaerobic flasks, gas exchange for N<sub>2</sub>.

#### **Solution VI : Vitamins-2**

- Thiamine-HCl 100 mg/L
- Filter sterilize in sterile anaerobic flasks, gas exchange for N<sub>2</sub>.

#### **Solution VII : Vitamins-3**

- Riboflavine 50 mg/L
- Filter sterilize in sterile anaerobic flasks, gas exchange for N<sub>2</sub>.

#### **Solution VIII : Vitamins-4**

- Cyanocobalamin 250 mg/L
- Filter sterilize in sterile anaerobic flasks, gas exchange for N<sub>2</sub>.

#### **Solution IX :**

- NH<sub>4</sub>HCO<sub>3</sub> 9.01g
  - NaHCO<sub>3</sub> 76.11 g/L
- Boil, cool down under N<sub>2</sub>/CO<sub>2</sub>, distribute 49 mL to anaerobic flasks, gas exchange for N<sub>2</sub>/CO<sub>2</sub>, autoclave.

#### **Solution X :**

- $\text{Na}_2\text{S}\cdot 9\text{H}_2\text{O}$  24.02 g in 100 mL
- ➔ Wash crystals with  $\text{N}_2$ -degassed  $\text{H}_2\text{O}$ , weight, dissolve in degassed  $\text{H}_2\text{O}$ , filter sterilize into anaerobic flasks, gas exchange for  $\text{N}_2$ .
